# Supplementary material
Source: PubMed Central journal article supplement (PMC2806120)

**Figure 4**  
*Rane et al*

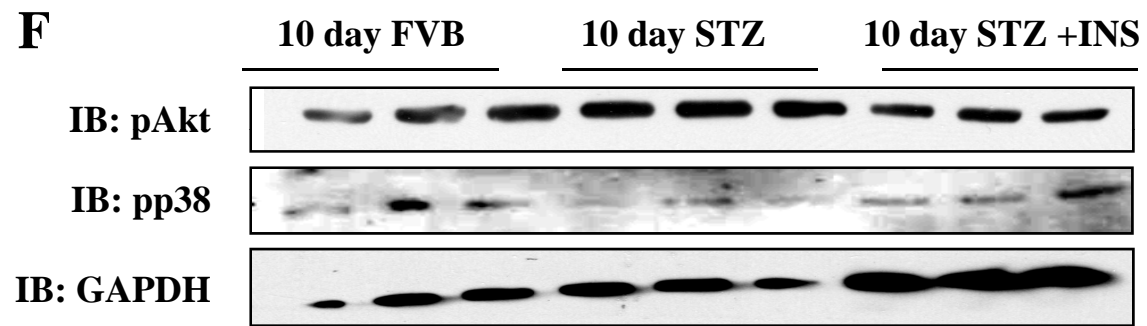



**Figure 8**  
*Rane et al*

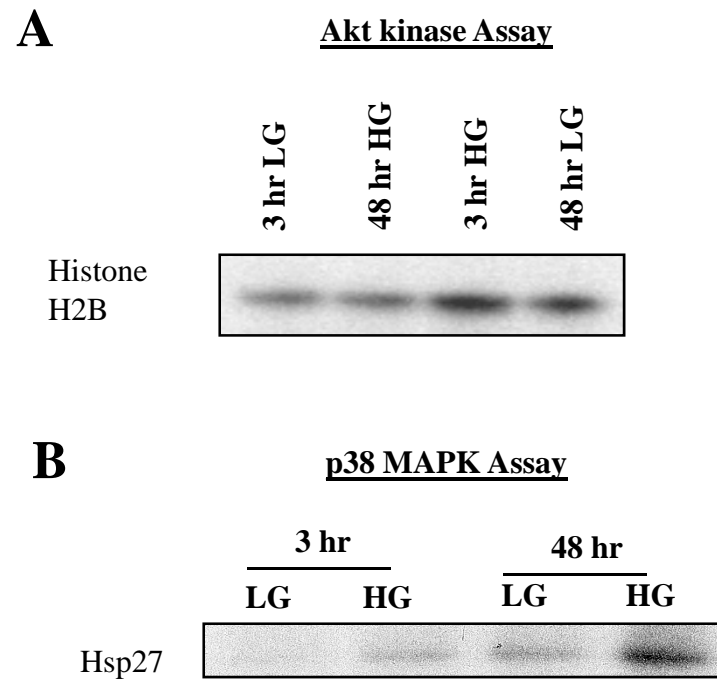

**Figure 11**  
*Rane et al*

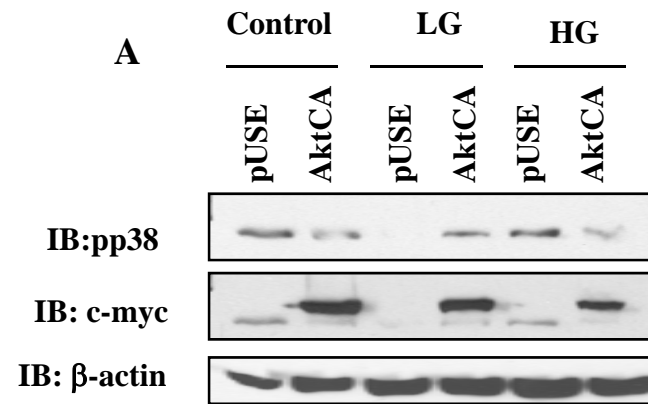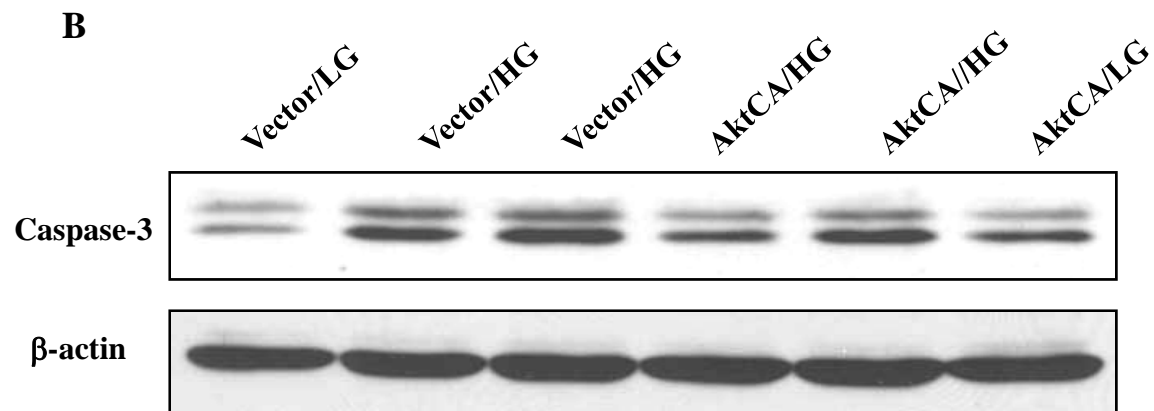

**Figure 12 A**  
**Rane *et al***

**A**

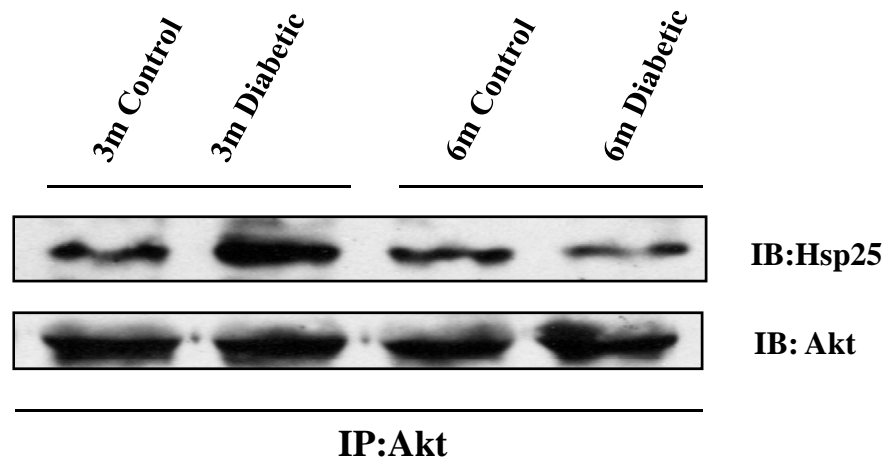

Supplement: 00032.2009_1.pdf [file 00032.2009_1.pdf]
